# Supplementary figures and images for: More P450s Are Involved in Secondary Metabolite Biosynthesis in Streptomyces Compared to Bacillus, Cyanobacteria, and Mycobacterium
Source: MDPI journal article supplement (doi:10.3390/ijms21134814), 2020-07-07

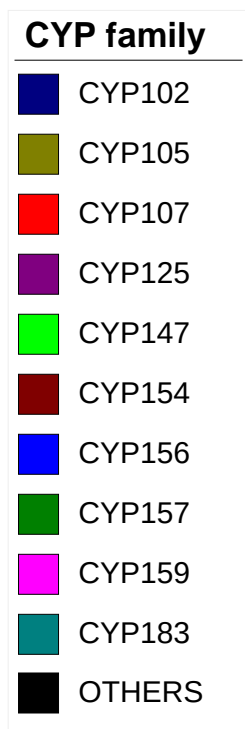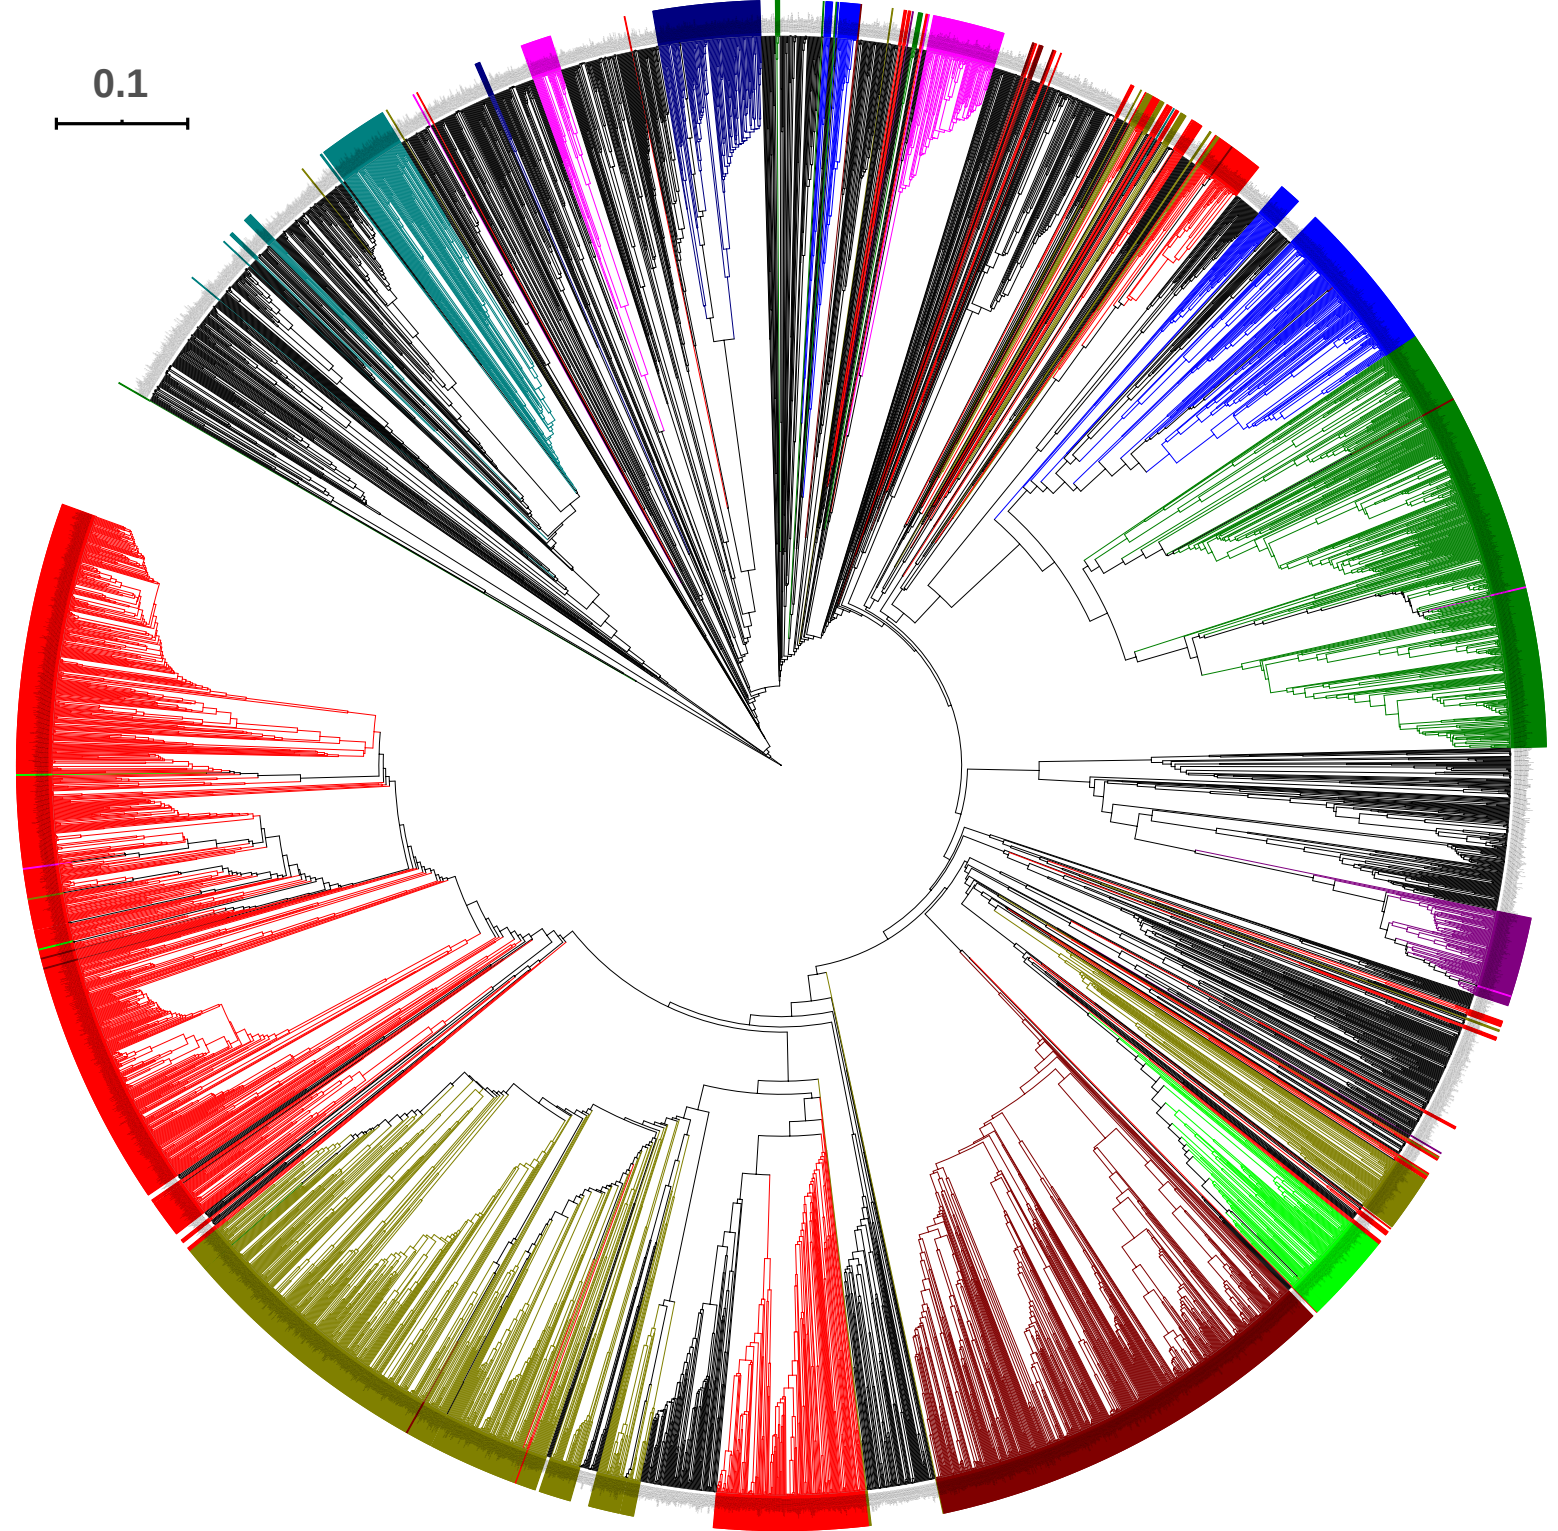

Supplement: s1 [file s1]
